# Supplementary material for: Depth of the Steroid Core Location Determines the Mode of Na,K-ATPase Inhibition by Cardiotonic Steroids
Source: MDPI journal article supplement (doi:10.3390/ijms222413268), 2021-12-09
Supplement: s1 [file s1]

## SUPPLEMENTARY MATERIALS

**Ouabain**

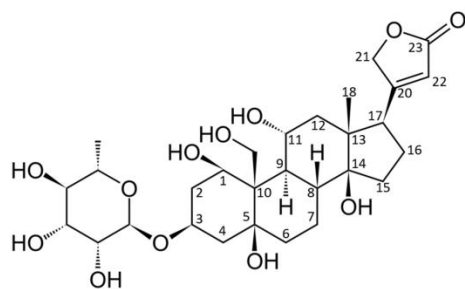

**Digoxin**

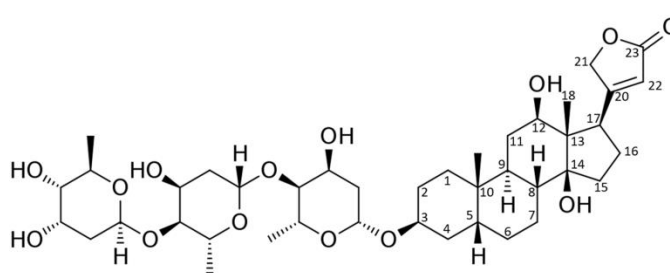

**Marinobufagenin**

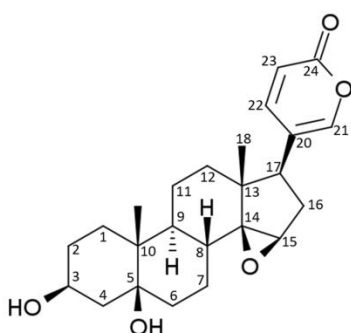

**Bufalin**

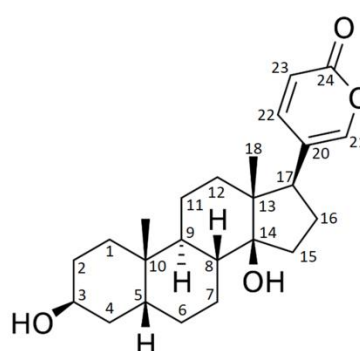

**Figure S1.** Structures of cardiotonic steroids. Cardenolides — ouabain and digoxin — are shown. Bufadienolides — marinobufagenin and bufalin — are shown.

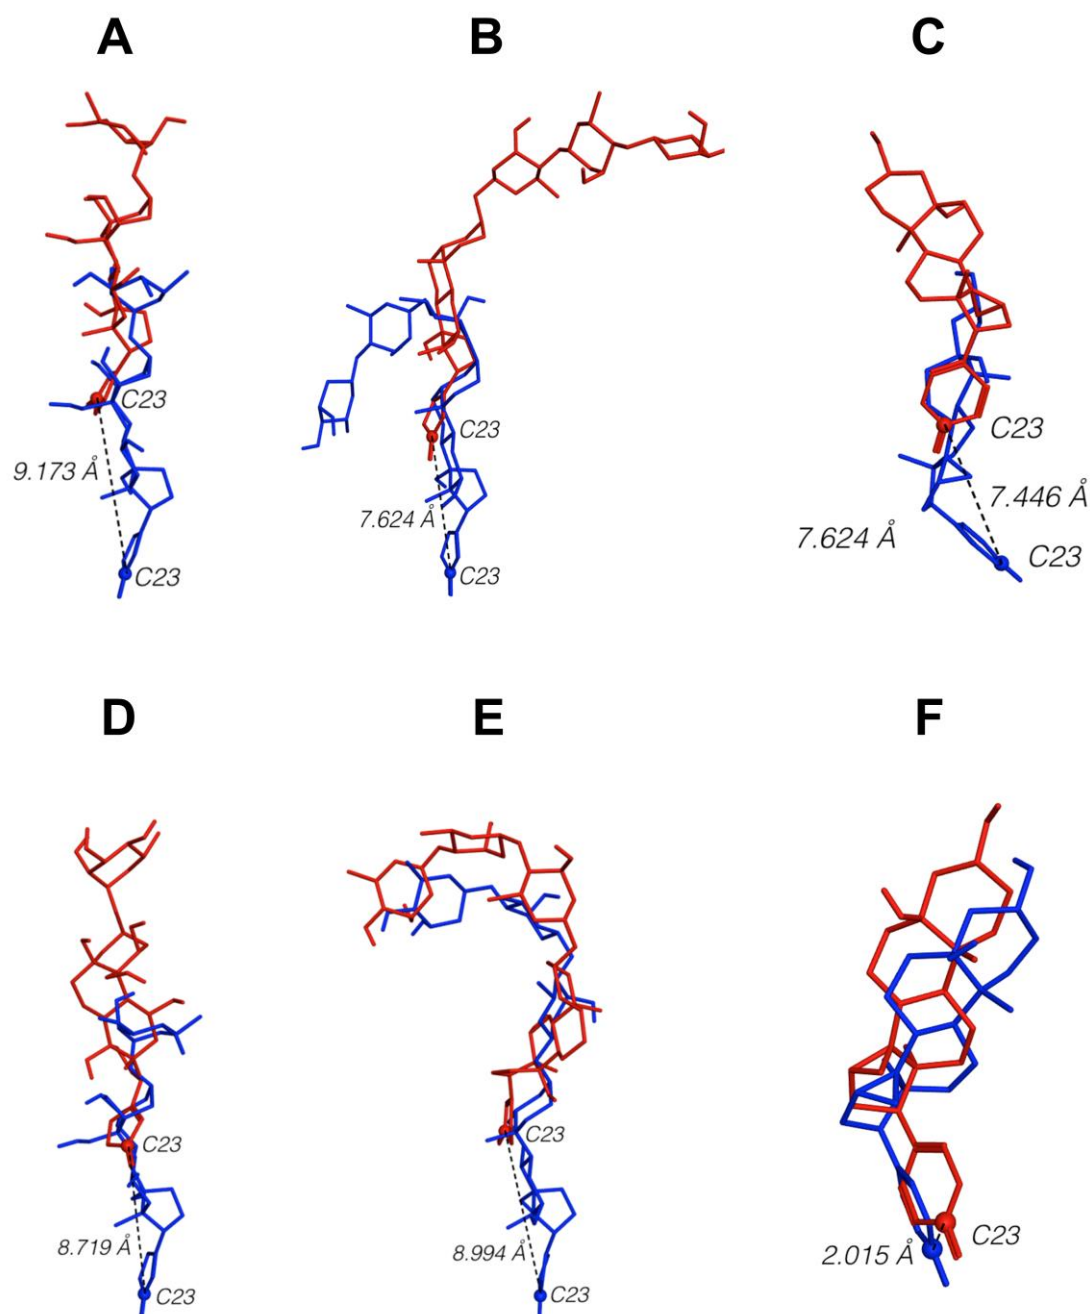

**Figure S2.** Superposition of cardiotonic steroids in the binding site of Na,K-ATPase. Difference in the deepening of the steroid nucleus of cardiotonic steroids between  $\alpha 1S$ -Na,K-ATPase and  $\alpha 1R$ -Na,K-ATPase: (A,D)—ouabain, (B,E)—digoxin, (C,F)—marinobufagenin. The distance was measured from C23 of the ligand docked to  $\alpha 1S$ -Na,K-ATPase to the ligand docked to  $\alpha 1R$ -NKA ((A–C) for the 4HYT; (D–F) for the 4RET model). Cardiotonic steroids from the  $\alpha 1S$ -Na,K-ATPase model colored in blue and from the  $\alpha 1R$ -Na,K-ATPase model colored in red.

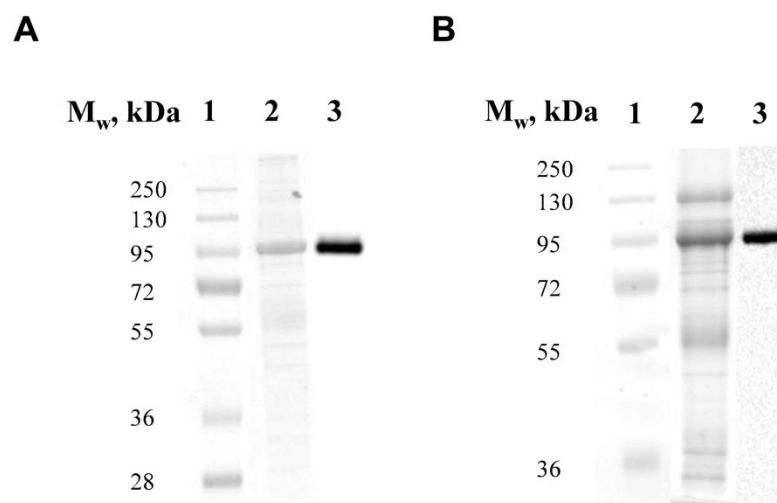

**Figure S3.** Analysis of purified Na,K-ATPase. Sodium dodecyl sulfate-polyacrylamide gel electrophoresis (lines 1–2) and Western blot analysis (line 3) of purified Na,K-ATPase from pig (A) and rat (B) kidneys. 1—molecular weight standards; 2,3—purified Na,K-ATPase.

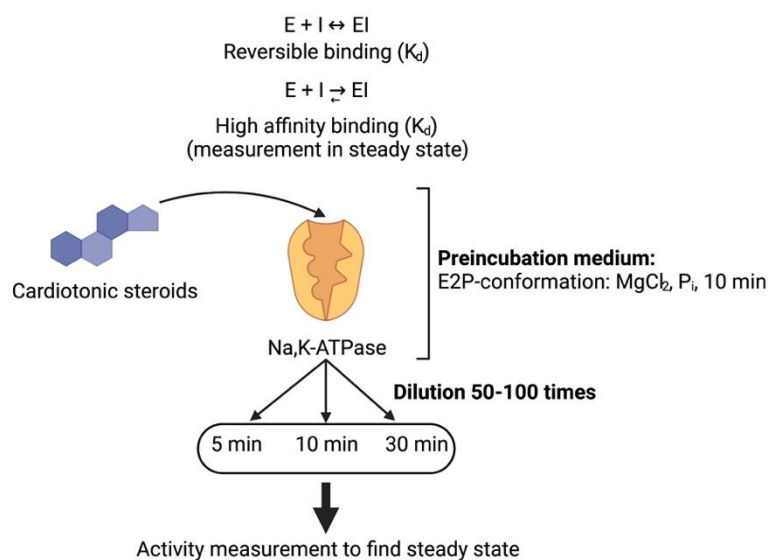

**Figure S4.** Scheme of the experiment to determine the type of inhibition. Na,K-ATPase in E2P-conformation was preincubated with different concentrations of cardiotoxic steroids for different time intervals. Then aliquots of the preincubation medium were transferred into the incubation medium for the enzyme activity assay.
